# Supplementary material for: Using genetic variation in Aedes aegypti to identify candidate anti-dengue virus genes
Source: Springer Nature journal article supplement (doi:10.1186/s12879-019-4212-z), 2019-07-04
Supplement: MOESM1 [file 16882622]

**Table S1.** – Primer sequences used to test the expression of the different gene candidates.

| <u>GENE ACCESSION</u> | <u>FW</u>               | <u>RV</u>             | <u>LENGTH PRODUCT (BP)</u> | <u>TM</u> |
|-----------------------|-------------------------|-----------------------|----------------------------|-----------|
| <b>AAEL001022</b>     | GCTACCGCTCATACGGACAC    | CAGCACCATTTTCGTCATTG  | 99                         | 60        |
| <b>AAEL001156</b>     | GAAGCAGTCCCTCTGGAATCG   | ATGTTGAAGGCGGAAATCAC  | 160                        | 60        |
| <b>AAEL001392</b>     | ATGGTGGACATGCTGGAGTC    | TCCGTGACCTCCTCCATAAG  | 71                         | 60        |
| <b>AAEL002413</b>     | GCAGGTTTTTGGGGTGACTA    | GGTGTGGGTTCGTATCTGT   | 85                         | 60        |
| <b>AAEL002585</b>     | ATCCCGTATCAGGAACAACG    | CGTCGGCTACGAAATTGTCT  | 115                        | 60        |
| <b>AAEL003619</b>     | AAGGTGGTCATCGGTATTGC    | AGAAGGTGAACGCTTCCAGA  | 148                        | 60        |
| <b>AAEL003787</b>     | GTAGCGAGCAATAGCGAACC    | ACTCACTGGCCTGCAGTTCT  | 76                         | 60        |
| <b>AAEL004361</b>     | GTCACGCTATGGGTTTCATCC   | CGTTCCTCGCTATTCCAC    | 198                        | 60        |
| <b>AAEL004861</b>     | GAAAGCAGCGAAGAAACCAG    | CAATGACACAGTCGGAATCG  | 137                        | 60        |
| <b>AAEL005064</b>     | TCCTCTGGACACTCCAATCC    | CTCGTCGATCTTGGTGTGA   | 112                        | 60        |
| <b>AAEL005527</b>     | GGAGCTGTTTCGAGGAGTTTG   | CTCGGCGATCGATATCTTGT  | 76                         | 60        |
| <b>AAEL006995</b>     | GTCCCTCTGTCCGAAATCCAA   | TTC'TACGACCATCACCAGCA | 92                         | 60        |
| <b>AAEL007495</b>     | GACATTTATCGCAGCCGAGT    | AGCCATCTTGCCGTTATCTC  | 94                         | 60        |
| <b>AAEL007845</b>     | ACACTGCTGGACAGGAAAGG    | GTCGCTGAAGCTCTTTGACC  | 138                        | 60        |
| <b>AAEL008013</b>     | ACGATGTCTCTATCCGCAAG    | ATCCCTCTCCTTCCAGCACT  | 76                         | 60        |
| <b>AAEL008108</b>     | TATGTCCGATGTCCCAAAGG    | CAGGTGTCCAGATGATGAG   | 147                        | 60        |
| <b>AAEL009317</b>     | AACCGTCACCATCAGGAGAG    | CGAACGGGACAGAAAAGAG   | 141                        | 60        |
| <b>AAEL009602</b>     | TTGGAGGATCGTTTCTGGAC    | GTAGGCAGGGTATGCTGGAA  | 98                         | 60        |
| <b>AAEL009770</b>     | TCAAGGACGACTACCCAACC    | CCAGTCC'TTCTCCTCATCCA | 119                        | 60        |
| <b>AAEL011375</b>     | GTCGGATTAGTGTCTGGGATG   | CGAAGATAGCCTGCGAGAAA  | 136                        | 60        |
| <b>AAEL011566</b>     | GGACGAGAAGCTCAACGAAC    | GGAGCAGATTCCACCACAAT  | 147                        | 60        |
| <b>AAEL011817</b>     | GCTTGGCCCTGTTGTAATGT    | TACGACCAACCGTTCAAACA  | 76                         | 60        |
| <b>AAEL012089</b>     | GCCAATAAGAAGTCACCCCTCTG | CGGTTTTGTCTGTTTCCCTTT | 94                         | 60        |
| <b>AAEL013712</b>     | TGTGCAGCTTCTGGTCAAAC    | GATGGCGGTTGACCTTCTTA  | 100                        | 60        |
| <b>AAEL014108</b>     | CGCTACGTCCAGCTGTATTG    | CCTCGATGAACGCTCCTAAG  | 115                        | 60        |
